# Supplementary material for: Exploration of photophysics of 2,2’-pyridil at room temperature and 77 K: a combined spectroscopic and quantum chemical approach
Source: Royal Society of Chemistry journal article supplement (doi:10.1039/c6pp00378h), 2016-11-22
Supplement: c6pp00378h1.pdf [file c6pp00378h1.pdf]

## Exploration of photophysics of 2,2'-pyridil at room temperature and 77 K: A combined spectroscopic and quantum chemical approach

Pronab Kundu, Saptarshi Ghosh and Nitin Chattopadhyay\*

Department of Chemistry, Jadavpur University, Kolkata - 700 032, India

\*Corresponding author: Fax: 91-33-2414-6584

E-mail: [nitin.chattopadhyay@yahoo.com](mailto:nitin.chattopadhyay@yahoo.com)

### Electronic supplementary information

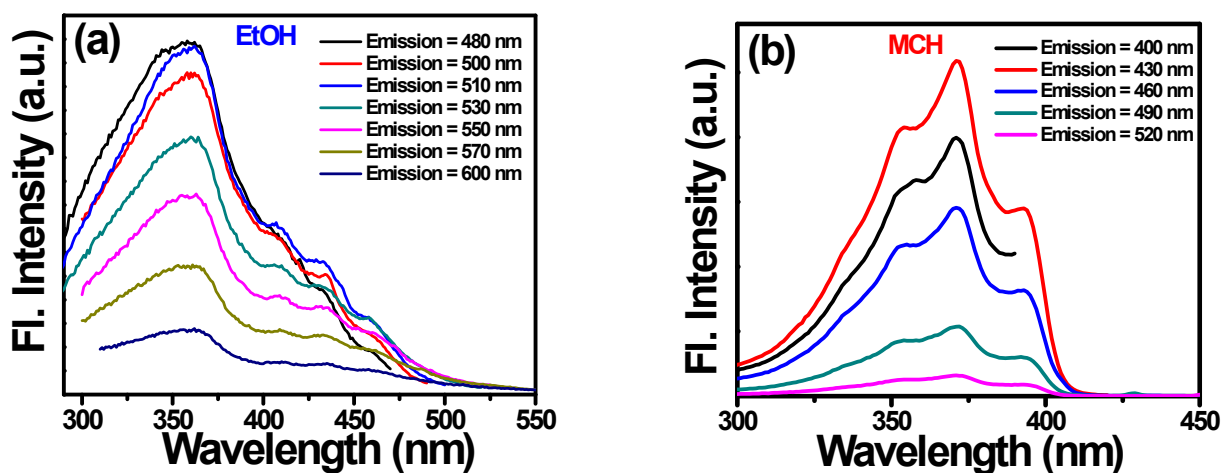

**Fig. S1** Room Temperature excitation spectra of 2,2'-pyridil monitoring at different wavelengths under the entire emission band in both (a) EtOH and (b) MCH solvents upon photoexcitation at the  $n\pi^*$  absorption band. Monitoring emission wavelengths are shown in the legends.

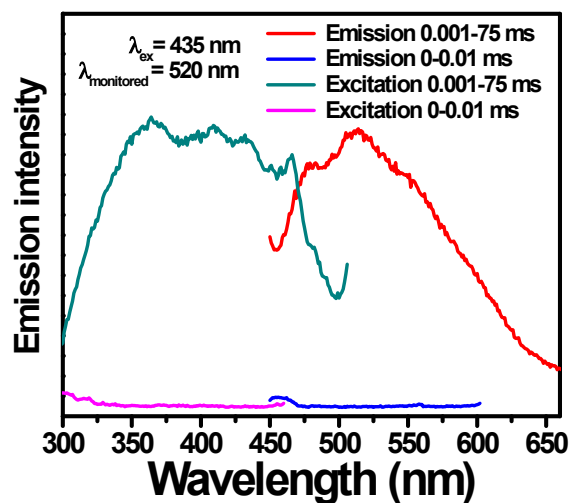

**Fig. S2** Room temperature emission and excitation spectra of 2,2'-pyridil in ethanol at different time windows as labeled in the legends.

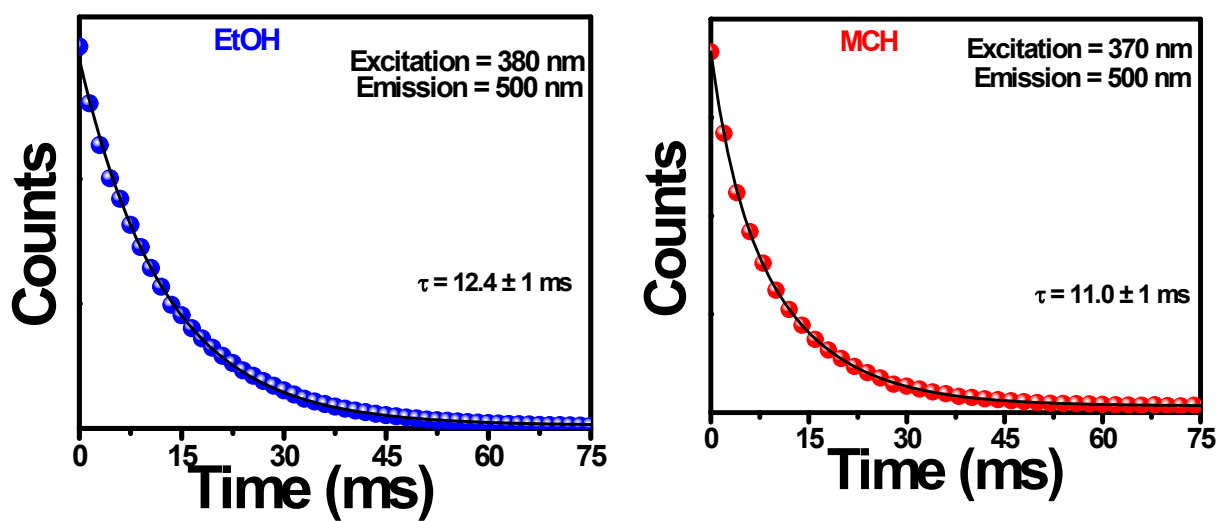

**Fig. S3** Phosphorescence decays of 2,2'-pyridil in EtOH and MCH matrices at 77 K. Excitation and monitoring wavelengths are given in the legends.

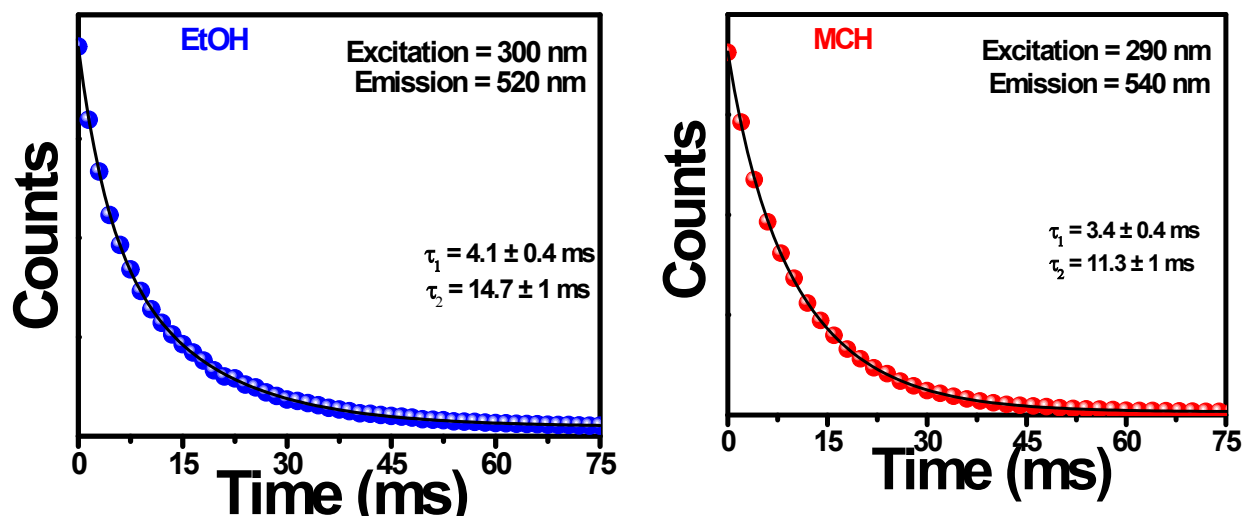

**Fig. S4** Lower energy phosphorescence decays of 2,2'-pyridil in EtOH and MCH matrices at 77 K. Excitation and monitoring wavelengths are given in the legends.

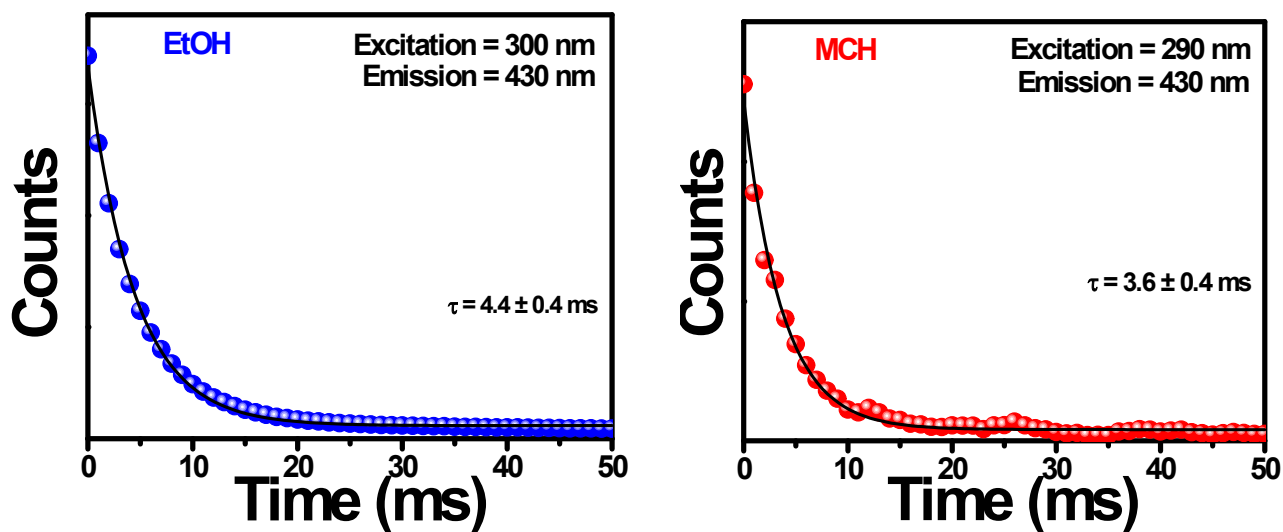

**Fig. S5** Higher energy phosphorescence decays of 2,2'-pyridil in EtOH and MCH matrices at 77 K upon excitation at the  $\pi\pi^*$  band. Excitation and monitoring wavelengths are given in the legends.

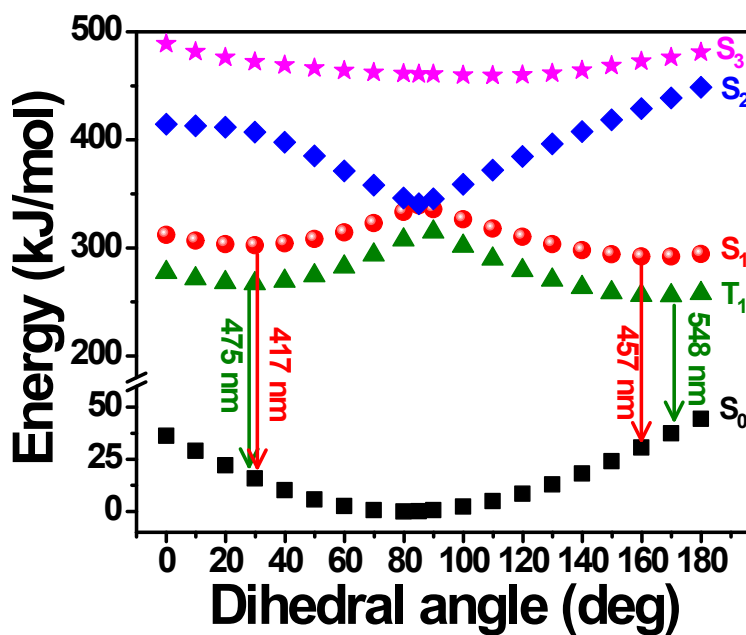

**Fig. S6** Potential energy curves (PECs) of 2,2'-pyridil in  $S_0$ ,  $S_1$ ,  $S_2$ ,  $S_3$  and  $T_1$  electronic states as a function of intercarbonyl dihedral angle ( $\Phi$ ) in vacuum.

**Table S1** Phosphorescence decay parameters of 2,2'-pyridil in EtOH and in MCH matrices at 77 K.

| Solvent | $\lambda_{\text{ex}}$ (nm) | $\lambda_{\text{em}}$ (nm) | $\tau_1$ (ms) | $\tau_2$ (ms) | $a_1$ | $a_2$ | $R^2$  |
|---------|----------------------------|----------------------------|---------------|---------------|-------|-------|--------|
| EtOH    | 300                        | 430                        | $4.4 \pm 0.4$ |               |       |       | 0.9983 |
|         | 300                        | 520                        | $4.1 \pm 0.4$ | $14.7 \pm 1$  | 0.43  | 0.57  | 0.9999 |
|         | 380                        | 500                        | $12.4 \pm 1$  |               |       |       | 0.9991 |
| MCH     | 290                        | 430                        | $3.6 \pm 0.4$ |               |       |       | 0.9930 |
|         | 290                        | 540                        | $3.4 \pm 0.4$ | $11.3 \pm 1$  | 0.13  | 0.87  | 0.9999 |
|         | 370                        | 500                        | $11.0 \pm 1$  |               |       |       | 0.9999 |

**Table S2** Experimental and theoretical absorption wavelengths of 2,2'-pyridil in EtOH and MCH.

| Solvent | Absorption positions                                      |                               |
|---------|-----------------------------------------------------------|-------------------------------|
|         | Experimental                                              | Calculated                    |
| EtOH    | ~ 360 nm and ~ 340 nm ( $n\pi^*$ ); 270 nm ( $\pi\pi^*$ ) | ~ 348 nm and ~ 336 nm; 284 nm |
| MCH     | ~ 370 nm and ~ 350 nm ( $n\pi^*$ ); 268 nm ( $\pi\pi^*$ ) | ~ 354 nm and ~ 341 nm; 282 nm |
